# Supplementary material
Source: Springer Nature journal article supplement (https://www.springermedizin.de/resource/supplementary/13034_2010_120_MOESM1_ESM.pdf/9652358)

Arousal Rating

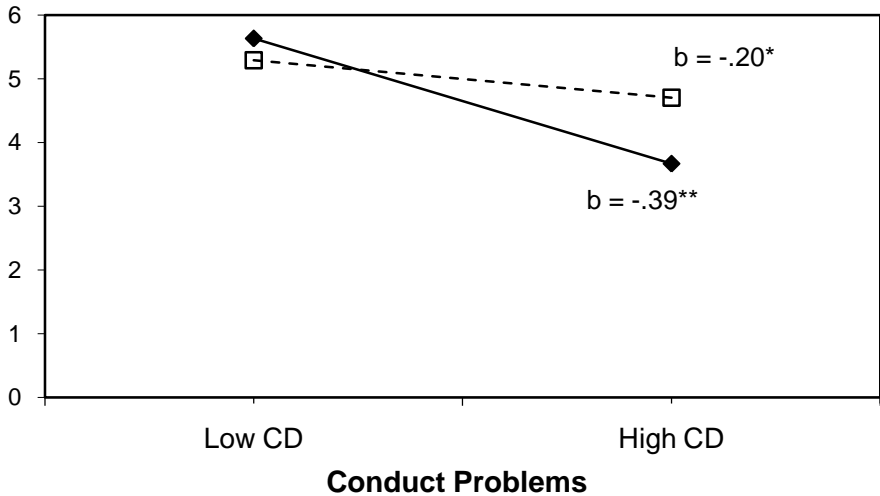

- □ - High HIA
- ◆ - Low HIA

Supplement: MOESM1 [file 9652358]
